# Supplementary material for: Optimizing Row Spacing Increases Stalk Lodging Resistance by Improving Light Distribution in Dense Maize Populations
Source: MDPI journal article supplement (doi:10.3390/agronomy13020462), 2023-02-03
Supplement: s1 [file s1]

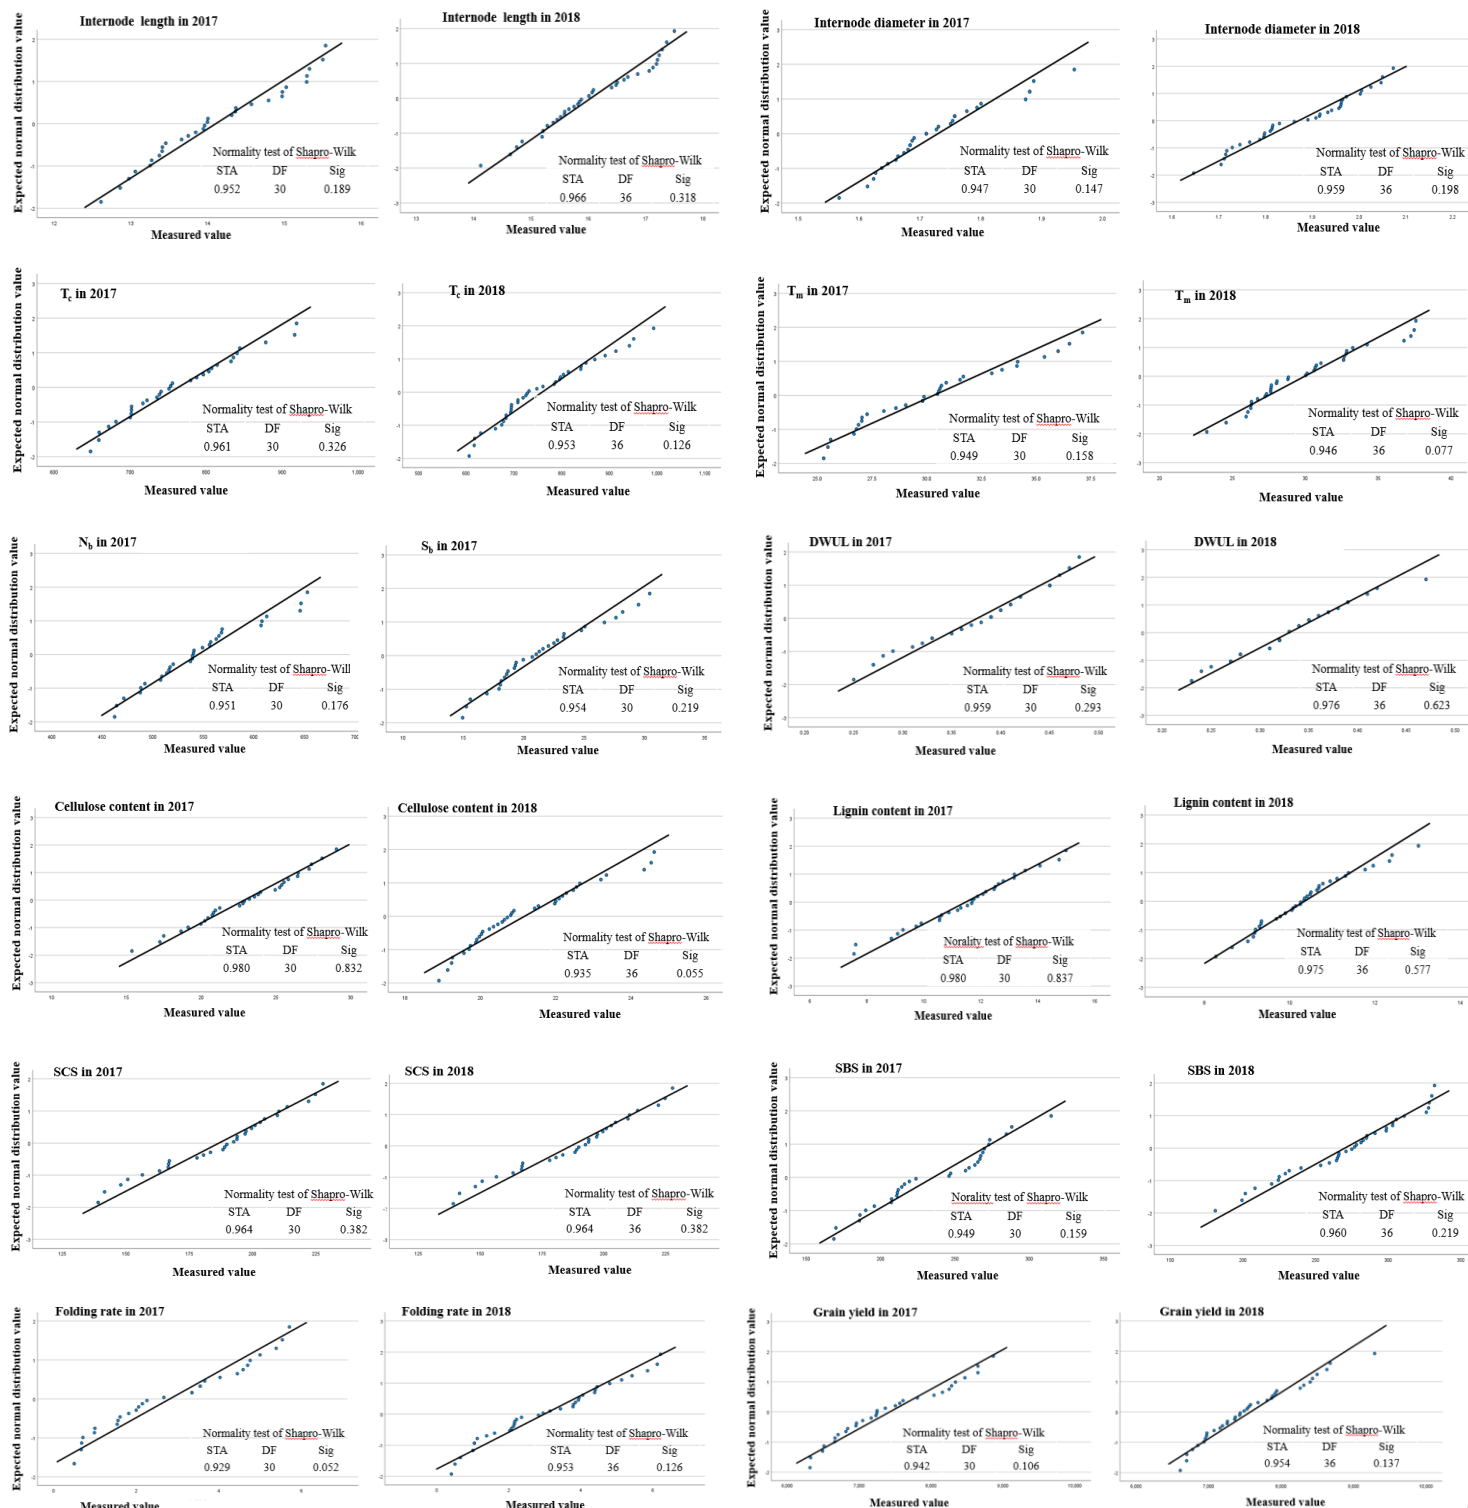

**Figure S1.** Figure of normal distribution Q-Q of major traits and its normality test.

Notes:  $T_m$ -mechanical tissue thickness.  $T_c$ - cortical thickness.  $N_b$ -total number of vascular bundles. DWUL- dry weight per unit stem length. SCS- stalk crushing strength. SBS- stalk breaking strength.

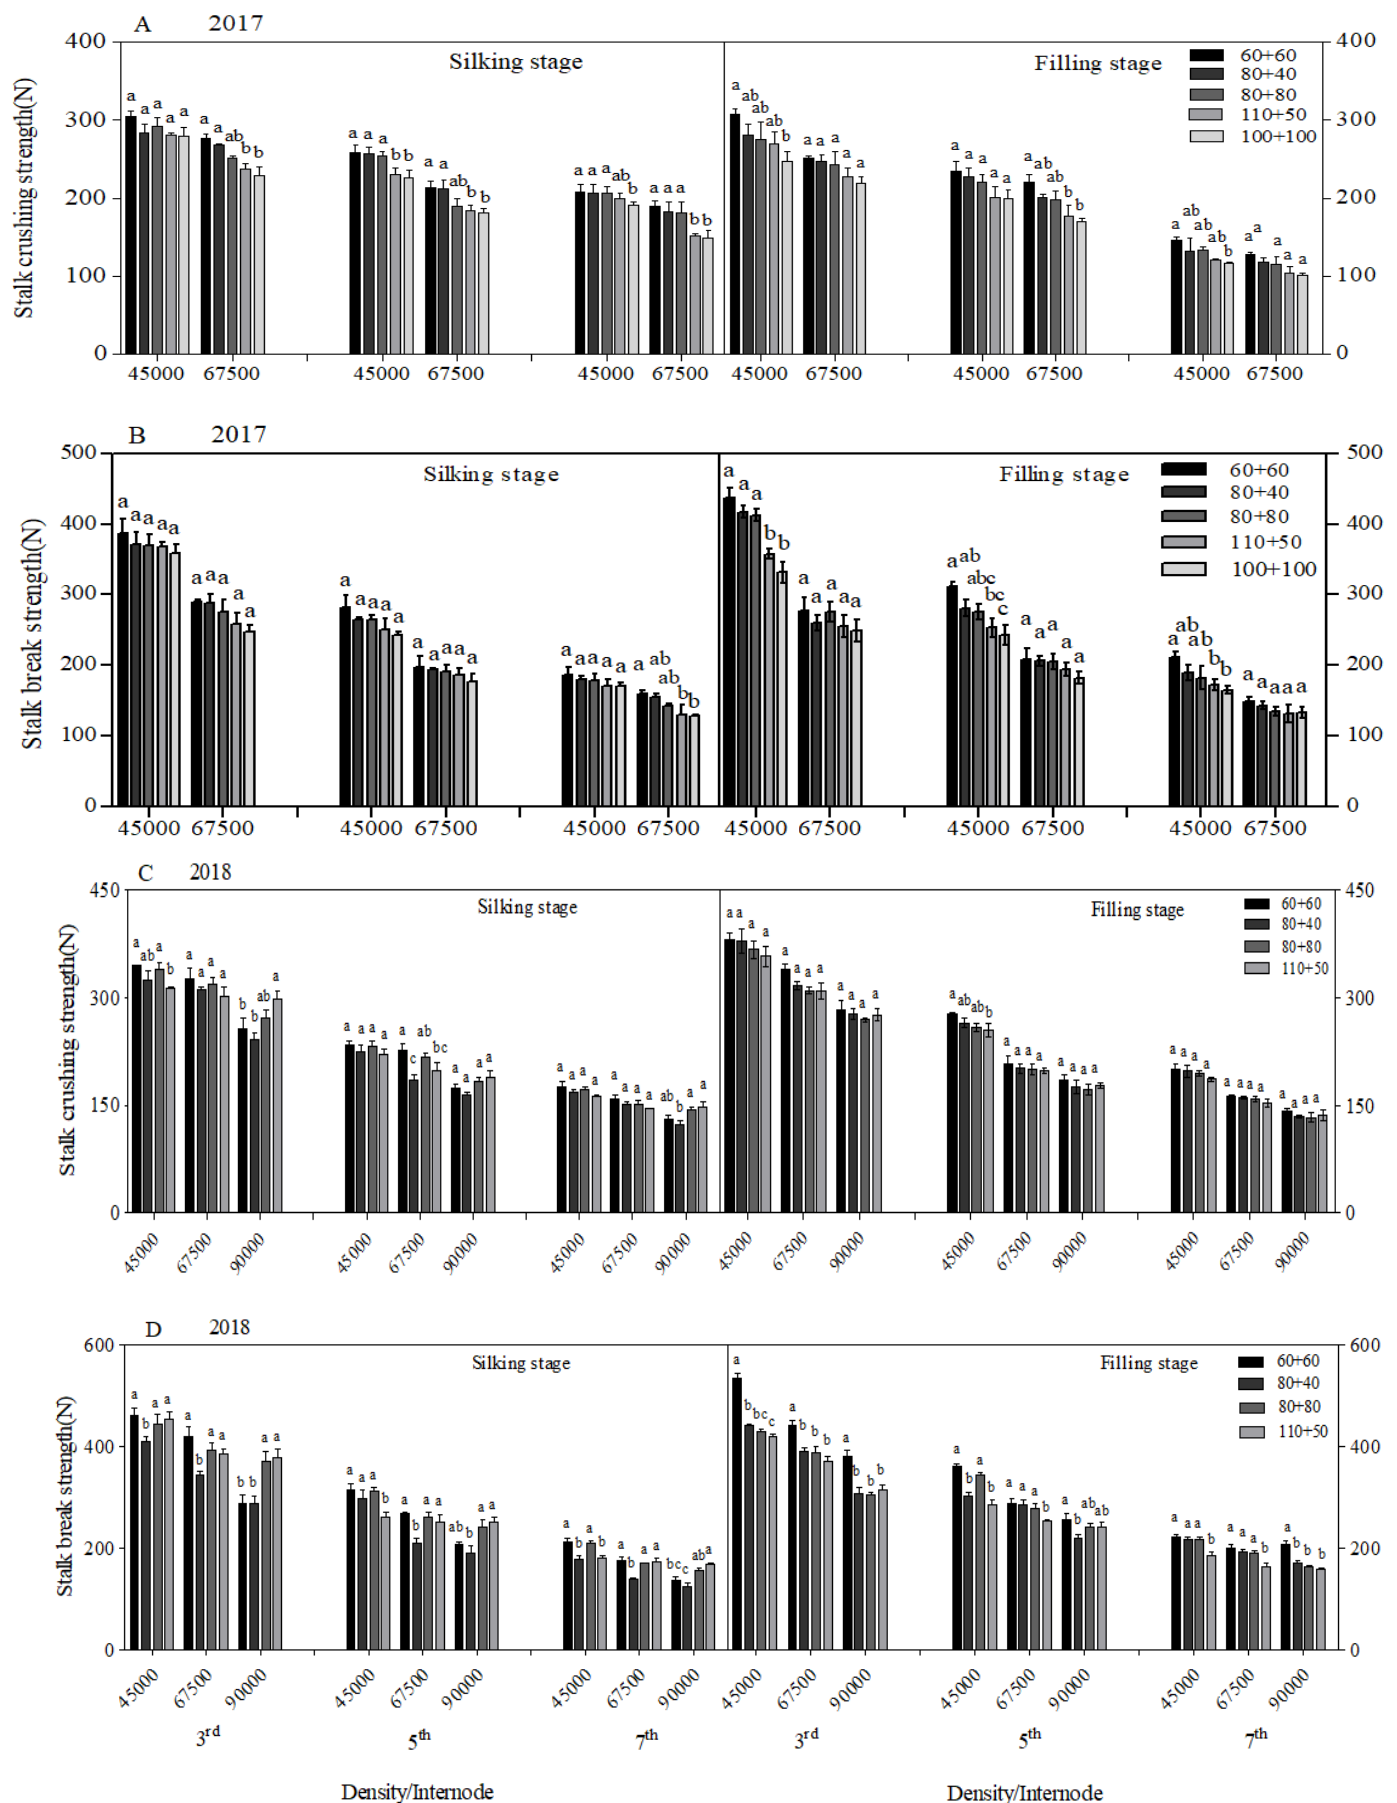

**Figure S2.** Effects of planting density and row spacing on SCS and SBS of basal internodes.

Note: The means of treatments were compared based on the Tukey test at a probability level of 0.05. In the same year, different lowercase letters indicate a significant difference.

Table S1. Effects of density and row spacing on the internode length (cm)

| Year | Density (D) | Row spacing(R) | Silking stage            |                          |                          | Filling stage            |                          |                          |
|------|-------------|----------------|--------------------------|--------------------------|--------------------------|--------------------------|--------------------------|--------------------------|
|      |             |                | 3 <sup>rd</sup>          | 5 <sup>th</sup>          | 7 <sup>th</sup>          | 3 <sup>rd</sup>          | 5 <sup>th</sup>          | 7 <sup>th</sup>          |
| 2017 | 45000       | 60+60          | 9.18±                    | 13.27±                   | 15.99±                   | 8.29±                    | 13.33±                   | 15.72±                   |
|      |             |                | 0.48 <sup>a</sup>        | 0.19 <sup>b</sup>        | 0.38 <sup>a</sup>        | 0.02 <sup>b</sup>        | 0.39 <sup>b</sup>        | 0.23 <sup>a</sup>        |
|      |             | 80+40          | 10.01                    | 13.75±                   | 16.47±                   | 8.46±                    | 14.07±                   | 16.15±                   |
|      |             |                | ±0.32 <sup>a</sup>       | 0.25 <sup>ab</sup>       | 0.27 <sup>a</sup>        | 0.33 <sup>b</sup>        | 0.20 <sup>b</sup>        | 0.21 <sup>a</sup>        |
|      |             | 80+80          | 9.57±                    | 13.47±                   | 16.54±                   | 8.92±                    | 14.00±                   | 16.26±                   |
|      |             |                | 0.41 <sup>a</sup>        | 0.22 <sup>b</sup>        | 0.25 <sup>a</sup>        | 0.15 <sup>b</sup>        | 0.16 <sup>b</sup>        | 0.32 <sup>a</sup>        |
|      |             | 110+50         | 10.02±                   | 14.75±                   | 16.59±                   | 9.81±                    | 15.57±                   | 16.26±                   |
|      | 67500       | 100+100        | 10.13±                   | 14.52±                   | 16.76±                   | 9.94±                    | 16.08±                   | 16.38±                   |
|      |             |                | 0.15 <sup>a</sup>        | 0.47 <sup>a</sup>        | 0.14 <sup>a</sup>        | 0.11 <sup>a</sup>        | 0.41 <sup>a</sup>        | 0.13 <sup>a</sup>        |
|      |             | <b>Mean</b>    | <b>9.78<sup>b</sup></b>  | <b>13.95<sup>b</sup></b> | <b>16.47<sup>b</sup></b> | <b>9.08<sup>b</sup></b>  | <b>14.61<sup>b</sup></b> | <b>16.15<sup>a</sup></b> |
|      |             | 60+60          | 11.20±                   | 14.12±                   | 16.79±                   | 9.58±                    | 15.08±                   | 16.55±                   |
|      |             |                | 0.09 <sup>b</sup>        | 0.29 <sup>b</sup>        | 0.25 <sup>a</sup>        | 0.07 <sup>b</sup>        | 0.34 <sup>b</sup>        | 0.34 <sup>b</sup>        |
|      |             | 80+40          | 11.40±                   | 15.08±                   | 17.04±                   | 10.90±                   | 16.04±                   | 17.07±                   |
|      |             |                | 0.35 <sup>ab</sup>       | 0.24 <sup>a</sup>        | 0.34 <sup>a</sup>        | 0.29 <sup>a</sup>        | 0.23 <sup>ab</sup>       | 0.18 <sup>ab</sup>       |
|      |             | 80+80          | 11.42±                   | 15.41±                   | 17.69±                   | 10.92±                   | 15.35±                   | 17.32±                   |
|      |             |                | 0.20 <sup>ab</sup>       | 0.17 <sup>a</sup>        | 0.24 <sup>a</sup>        | 0.07 <sup>a</sup>        | 0.50 <sup>ab</sup>       | 0.44 <sup>ab</sup>       |
|      | F-Value     | 110+50         | 12.43±                   | 15.61±                   | 17.60±                   | 11.48±                   | 16.33±                   | 17.54±                   |
|      |             | 100+100        | 12.55±                   | 15.76±                   | 18.03±                   | 11.59±                   | 16.76±                   | 18.01±                   |
|      |             |                | 0.14 <sup>ab</sup>       | 0.03 <sup>a</sup>        | 0.19 <sup>a</sup>        | 0.17 <sup>a</sup>        | 0.51 <sup>ab</sup>       | 0.36 <sup>ab</sup>       |
|      |             | <b>Mean</b>    | <b>11.80<sup>a</sup></b> | <b>15.20<sup>a</sup></b> | <b>17.43<sup>a</sup></b> | <b>10.89<sup>a</sup></b> | <b>15.91<sup>a</sup></b> | <b>17.30<sup>a</sup></b> |
|      |             | D              | 30.17*                   | 276.97**                 | 30.90*                   | 130.59**                 | 12.51 <sup>ns</sup>      | 18.02 <sup>ns</sup>      |
|      |             | R              | 4.01*                    | 7.87**                   | 2.52 <sup>ns</sup>       | 21.39**                  | 10.48**                  | 2.68 <sup>ns</sup>       |
|      |             | D×R            | 0.80 <sup>ns</sup>       | 1.02 <sup>ns</sup>       | 0.33 <sup>ns</sup>       | 1.79 <sup>ns</sup>       | 1.04 <sup>ns</sup>       | 0.45 <sup>ns</sup>       |
| 2018 | 45000       | 60+60          | 8.27±                    | 16.72±                   | 18.62±                   | 8.44±                    | 17.69±                   | 20.20±                   |
|      |             |                | 0.21 <sup>ab</sup>       | 0.06 <sup>b</sup>        | 0.43 <sup>b</sup>        | 0.30 <sup>b</sup>        | 0.45 <sup>a</sup>        | 0.32 <sup>b</sup>        |
|      |             | 80+40          | 8.62±                    | 18.16±                   | 19.08±                   | 9.03±                    | 18.00±                   | 20.45±                   |
|      |             |                | 0.24 <sup>a</sup>        | 0.27 <sup>a</sup>        | 0.26 <sup>ab</sup>       | 0.16 <sup>ab</sup>       | 0.46 <sup>a</sup>        | 0.02 <sup>bc</sup>       |
|      |             | 80+80          | 7.88±                    | 18.30±                   | 19.44±                   | 9.17±                    | 18.53±                   | 20.61±                   |
|      |             |                | 0.18 <sup>b</sup>        | 0.19 <sup>a</sup>        | 0.32 <sup>a</sup>        | 0.27 <sup>a</sup>        | 0.16 <sup>a</sup>        | 0.26 <sup>ab</sup>       |
|      |             | 110+50         | 8.76±                    | 18.83±                   | 19.66±                   | 9.28±                    | 18.72±                   | 21.15±                   |
|      | 67500       | 100+100        | 8.76±                    | 18.83±                   | 19.66±                   | 9.28±                    | 18.72±                   | 21.15±                   |
|      |             |                | 0.12 <sup>a</sup>        | 0.10 <sup>a</sup>        | 0.22 <sup>a</sup>        | 0.26 <sup>a</sup>        | 0.19 <sup>a</sup>        | 0.54 <sup>a</sup>        |
|      |             | <b>Mean</b>    | <b>8.38<sup>b</sup></b>  | <b>18.00<sup>a</sup></b> | <b>19.20<sup>b</sup></b> | <b>8.98<sup>c</sup></b>  | <b>18.24<sup>c</sup></b> | <b>20.60<sup>b</sup></b> |
|      |             | 60+60          | 8.71±                    | 18.44±                   | 19.46±                   | 9.47±                    | 18.78±                   | 20.44±                   |
|      |             |                | 0.08 <sup>a</sup>        | 0.28 <sup>a</sup>        | 0.42 <sup>b</sup>        | 0.18 <sup>a</sup>        | 0.41 <sup>a</sup>        | 0.16 <sup>b</sup>        |
|      |             | 80+40          | 8.89±                    | 18.70±                   | 20.25±                   | 9.81±                    | 18.78±                   | 20.58±                   |
|      |             |                | 0.11 <sup>a</sup>        | 0.29 <sup>a</sup>        | 0.34 <sup>ab</sup>       | 0.13 <sup>a</sup>        | 0.30 <sup>a</sup>        | 0.18 <sup>ab</sup>       |
|      |             | 80+80          | 8.93±                    | 18.44±                   | 20.37±                   | 9.97±                    | 19.03±                   | 21.09±                   |
|      |             |                | 0.16 <sup>a</sup>        | 0.31 <sup>a</sup>        | 0.29 <sup>ab</sup>       | 0.26 <sup>a</sup>        | 0.36 <sup>a</sup>        | 0.07 <sup>ab</sup>       |
|      | 90000       | 110+50         | 9.04±                    | 18.96±                   | 20.58±                   | 10.25±                   | 19.36±                   | 21.44±                   |
|      |             |                | 0.34 <sup>a</sup>        | 0.06 <sup>a</sup>        | 0.36 <sup>a</sup>        | 0.10 <sup>a</sup>        | 0.11 <sup>a</sup>        | 0.06 <sup>a</sup>        |
|      |             | <b>Mean</b>    | <b>8.89<sup>b</sup></b>  | <b>18.63<sup>a</sup></b> | <b>20.17<sup>b</sup></b> | <b>9.87<sup>b</sup></b>  | <b>18.99<sup>b</sup></b> | <b>20.89<sup>b</sup></b> |
|      |             | 60+60          | 9.73±                    | 18.56±                   | 21.46±                   | 9.67±                    | 18.83±                   | 21.47±                   |
|      |             |                | 0.12 <sup>a</sup>        | 0.39 <sup>a</sup>        | 0.15 <sup>b</sup>        | 0.25 <sup>b</sup>        | 0.45 <sup>a</sup>        | 0.24 <sup>b</sup>        |
|      |             | 80+40          | 10.03±                   | 18.91±                   | 22.60±                   | 10.47±                   | 19.58±                   | 22.06±                   |
|      |             |                | 0.12 <sup>a</sup>        | 0.25 <sup>a</sup>        | 0.01 <sup>a</sup>        | 0.26 <sup>ab</sup>       | 0.34 <sup>a</sup>        | 0.11 <sup>ab</sup>       |
|      |             | 80+80          | 10.06±                   | 19.22±                   | 22.79±                   | 10.78±                   | 20.19±                   | 22.61±                   |
|      |             |                | 0.19 <sup>a</sup>        | 0.07 <sup>a</sup>        | 0.12 <sup>a</sup>        | 0.23 <sup>a</sup>        | 0.20 <sup>a</sup>        | 0.06 <sup>a</sup>        |
|      | F-Value     | 110+50         | 9.96±                    | 19.17±                   | 21.86±                   | 10.47±                   | 19.94±                   | 21.95±                   |
|      |             | 100+100        | 9.96±                    | 19.17±                   | 21.86±                   | 10.47±                   | 19.94±                   | 21.95±                   |
|      |             |                | 0.36 <sup>a</sup>        | 0.31 <sup>a</sup>        | 0.17 <sup>ab</sup>       | 0.28 <sup>ab</sup>       | 0.30 <sup>a</sup>        | 0.32 <sup>ab</sup>       |
|      |             | <b>Mean</b>    | <b>9.94<sup>a</sup></b>  | <b>18.97<sup>a</sup></b> | <b>22.18<sup>a</sup></b> | <b>10.35<sup>a</sup></b> | <b>19.64<sup>a</sup></b> | <b>22.02<sup>a</sup></b> |
|      |             | D              | 34.03**                  | 5.02 <sup>ns</sup>       | 29.56**                  | 60.75**                  | 40.80**                  | 21.74**                  |
|      |             | R              | 1.47 <sup>ns</sup>       | 8.77**                   | 7.66**                   | 4.45*                    | 3.01 <sup>ns</sup>       | 6.01**                   |
|      |             | D×R            | 0.97 <sup>ns</sup>       | 2.48 <sup>ns</sup>       | 1.33 <sup>ns</sup>       | 0.27 <sup>ns</sup>       | 0.33 <sup>ns</sup>       | 1.20 <sup>ns</sup>       |

Note: Values represent the average ± the standard error. The means of treatments were compared based on the Tukey test at a probability level of 0.05. In the same year, different lowercase letters indicate a significant difference. <sup>ns</sup>-non-significant. \*\* and \* indicate a significant level of 0.01 (p < 0.01) and 0.05 (p < 0.05) respectively.

**Table S2.** Effects of density and row spacing on the internode diameter (cm)

| Year | Density(D)      | Row spacing(R) | Silking stage               |                             |                             | Filling stage               |                             |                             |
|------|-----------------|----------------|-----------------------------|-----------------------------|-----------------------------|-----------------------------|-----------------------------|-----------------------------|
|      |                 |                | 3 <sup>rd</sup>             | 5 <sup>th</sup>             | 7 <sup>th</sup>             | 3 <sup>rd</sup>             | 5 <sup>th</sup>             | 7 <sup>th</sup>             |
| 2017 | 45000           | 60+60          | 1.89±<br>0.05 <sup>a</sup>  | 1.86±<br>0.04 <sup>a</sup>  | 1.84±<br>0.05 <sup>a</sup>  | 1.91±<br>0.05 <sup>a</sup>  | 1.86±<br>0.03 <sup>a</sup>  | 1.82±<br>0.03 <sup>a</sup>  |
|      |                 | 80+40          | 1.84±<br>0.03 <sup>a</sup>  | 1.81±<br>0.03 <sup>a</sup>  | 1.77±<br>0.02 <sup>ab</sup> | 1.88±<br>0.03 <sup>a</sup>  | 1.83±<br>0.03 <sup>a</sup>  | 1.77±<br>0.04 <sup>a</sup>  |
|      |                 | 80+80          | 1.80±<br>0.06 <sup>a</sup>  | 1.81±<br>0.04 <sup>a</sup>  | 1.72±<br>0.05 <sup>ab</sup> | 1.87±<br>0.03 <sup>a</sup>  | 1.81±<br>0.02 <sup>a</sup>  | 1.76±<br>0.01 <sup>a</sup>  |
|      |                 | 110+50         | 1.80±<br>0.08 <sup>a</sup>  | 1.79±<br>0.03 <sup>a</sup>  | 1.71±<br>0.04 <sup>ab</sup> | 1.86±<br>0.02 <sup>a</sup>  | 1.80±<br>0.04 <sup>a</sup>  | 1.76±<br>0.03 <sup>a</sup>  |
|      |                 | 100+100        | 1.76±<br>0.06 <sup>a</sup>  | 1.78±<br>0.04 <sup>a</sup>  | 1.65±<br>0.05 <sup>b</sup>  | 1.84±<br>0.01 <sup>a</sup>  | 1.80±<br>0.02 <sup>a</sup>  | 1.75±<br>0.02 <sup>a</sup>  |
|      |                 | <b>Mean</b>    | <b>1.82<sup>a</sup></b>     | <b>1.81<sup>a</sup></b>     | <b>1.74<sup>a</sup></b>     | <b>1.87<sup>a</sup></b>     | <b>1.82<sup>a</sup></b>     | <b>1.78<sup>a</sup></b>     |
|      | 67500           | 60+60          | 1.79±<br>0.04 <sup>a</sup>  | 1.67±<br>0.00 <sup>a</sup>  | 1.66±<br>0.02 <sup>a</sup>  | 1.83±<br>0.01 <sup>a</sup>  | 1.75±<br>0.02 <sup>a</sup>  | 1.69±<br>0.02 <sup>a</sup>  |
|      |                 | 80+40          | 1.78±<br>0.03 <sup>a</sup>  | 1.63±<br>0.00 <sup>a</sup>  | 1.63±<br>0.03 <sup>a</sup>  | 1.77±<br>0.01 <sup>a</sup>  | 1.71±<br>0.01 <sup>a</sup>  | 1.64±<br>0.01 <sup>a</sup>  |
|      |                 | 80+80          | 1.76±<br>0.03 <sup>a</sup>  | 1.66±<br>0.03 <sup>a</sup>  | 1.63±<br>0.03 <sup>a</sup>  | 1.75±<br>0.02 <sup>a</sup>  | 1.70±<br>0.00 <sup>a</sup>  | 1.63±<br>0.02 <sup>a</sup>  |
|      |                 | 110+50         | 1.66±<br>0.02 <sup>a</sup>  | 1.66±<br>0.02 <sup>a</sup>  | 1.63±<br>0.02 <sup>a</sup>  | 1.71±<br>0.05 <sup>a</sup>  | 1.69±<br>0.01 <sup>a</sup>  | 1.62±<br>0.04 <sup>a</sup>  |
|      |                 | 100+100        | 1.66±<br>0.05 <sup>a</sup>  | 1.63±<br>0.05 <sup>a</sup>  | 1.60±<br>0.02 <sup>a</sup>  | 1.70±<br>0.03 <sup>a</sup>  | 1.67±<br>0.02 <sup>a</sup>  | 1.61±<br>0.01 <sup>a</sup>  |
|      |                 | <b>Mean</b>    | <b>1.73<sup>a</sup></b>     | <b>1.65<sup>a</sup></b>     | <b>1.63<sup>b</sup></b>     | <b>1.75<sup>b</sup></b>     | <b>1.70<sup>b</sup></b>     | <b>1.64<sup>b</sup></b>     |
|      | <i>F</i> -Value | D              | 2.49 <sup>ns</sup>          | 15.72 <sup>ns</sup>         | 32.00 <sup>*</sup>          | 2707.89 <sup>*</sup>        | 66.22 <sup>*</sup>          | 54.66 <sup>*</sup>          |
|      |                 | R              | 2.17 <sup>ns</sup>          | 0.85 <sup>ns</sup>          | 2.07 <sup>ns</sup>          | 1.95 <sup>ns</sup>          | 1.57 <sup>ns</sup>          | 1.82 <sup>ns</sup>          |
|      |                 | D×R            | 0.24 <sup>ns</sup>          | 0.25 <sup>ns</sup>          | 0.70 <sup>ns</sup>          | 0.24 <sup>ns</sup>          | 0.10 <sup>ns</sup>          | 0.01 <sup>ns</sup>          |
| 2018 | 45000           | 60+60          | 2.13±<br>0.03 <sup>a</sup>  | 2.07±<br>0.01 <sup>a</sup>  | 1.89±<br>0.05 <sup>a</sup>  | 2.24±<br>0.03 <sup>a</sup>  | 2.14±<br>0.08 <sup>a</sup>  | 1.94±<br>0.01 <sup>a</sup>  |
|      |                 | 80+40          | 2.09±<br>0.07 <sup>a</sup>  | 2.07±<br>0.02 <sup>a</sup>  | 1.86±<br>0.03 <sup>a</sup>  | 2.19±<br>0.01 <sup>a</sup>  | 2.11±<br>0.01 <sup>ab</sup> | 1.93±<br>0.04 <sup>a</sup>  |
|      |                 | 80+80          | 2.04±<br>0.05 <sup>a</sup>  | 2.03±<br>0.04 <sup>a</sup>  | 1.84±<br>0.02 <sup>a</sup>  | 2.15±<br>0.02 <sup>a</sup>  | 2.09±<br>0.04 <sup>ab</sup> | 1.90±<br>0.02 <sup>ab</sup> |
|      |                 | 110+50         | 2.02±<br>0.01 <sup>a</sup>  | 2.01±<br>0.01 <sup>a</sup>  | 1.81±<br>0.02 <sup>a</sup>  | 2.01±<br>0.03 <sup>b</sup>  | 2.01±<br>0.03 <sup>b</sup>  | 1.83±<br>0.04 <sup>b</sup>  |
|      |                 | <b>Mean</b>    | <b>2.07<sup>a</sup></b>     | <b>2.04<sup>a</sup></b>     | <b>1.85<sup>a</sup></b>     | <b>2.15<sup>a</sup></b>     | <b>2.09<sup>a</sup></b>     | <b>1.90<sup>a</sup></b>     |
|      | 67500           | 60+60          | 2.06±<br>0.02 <sup>a</sup>  | 1.98±<br>0.02 <sup>a</sup>  | 1.85±<br>0.01 <sup>a</sup>  | 1.99±<br>0.01 <sup>a</sup>  | 1.93±<br>0.01 <sup>a</sup>  | 1.80±<br>0.04 <sup>a</sup>  |
|      |                 | 80+40          | 1.91±<br>0.05 <sup>ab</sup> | 1.89±<br>0.04 <sup>ab</sup> | 1.83±<br>0.01 <sup>a</sup>  | 1.96±<br>0.01 <sup>ab</sup> | 1.88±<br>0.03 <sup>a</sup>  | 1.76±<br>0.03 <sup>a</sup>  |
|      |                 | 80+80          | 1.88±<br>0.03 <sup>b</sup>  | 1.85±<br>0.01 <sup>b</sup>  | 1.83±<br>0.03 <sup>ab</sup> | 1.95±<br>0.03 <sup>b</sup>  | 1.87±<br>0.04 <sup>a</sup>  | 1.75±<br>0.01 <sup>a</sup>  |
|      |                 | 110+50         | 1.86±<br>0.03 <sup>b</sup>  | 1.82±<br>0.03 <sup>b</sup>  | 1.76±<br>0.01 <sup>b</sup>  | 1.86±<br>0.02 <sup>c</sup>  | 1.84±<br>0.02 <sup>a</sup>  | 1.73±<br>0.04 <sup>a</sup>  |
|      |                 | <b>Mean</b>    | <b>1.93<sup>b</sup></b>     | <b>1.89<sup>ab</sup></b>    | <b>1.82<sup>a</sup></b>     | <b>1.94<sup>b</sup></b>     | <b>1.88<sup>b</sup></b>     | <b>1.76<sup>b</sup></b>     |
|      | 90000           | 60+60          | 1.83±<br>0.04 <sup>a</sup>  | 1.80±<br>0.04 <sup>a</sup>  | 1.69±<br>0.04 <sup>a</sup>  | 1.93±<br>0.03 <sup>a</sup>  | 1.84±<br>0.05 <sup>a</sup>  | 1.72±<br>0.02 <sup>a</sup>  |
|      |                 | 80+40          | 1.81±<br>0.05 <sup>a</sup>  | 1.77±<br>0.05 <sup>a</sup>  | 1.66±<br>0.02 <sup>a</sup>  | 1.82±<br>0.01 <sup>ab</sup> | 1.76±<br>0.02 <sup>a</sup>  | 1.68±<br>0.01 <sup>a</sup>  |
|      |                 | 80+80          | 1.80±<br>0.02 <sup>a</sup>  | 1.74±<br>0.01 <sup>a</sup>  | 1.65±<br>0.01 <sup>a</sup>  | 1.80±<br>0.02 <sup>b</sup>  | 1.77±<br>0.02 <sup>a</sup>  | 1.66±<br>0.03 <sup>a</sup>  |
|      |                 | 110+50         | 1.81±<br>0.01 <sup>a</sup>  | 1.78±<br>0.02 <sup>a</sup>  | 1.66±<br>0.03 <sup>a</sup>  | 1.83±<br>0.04 <sup>ab</sup> | 1.82±<br>0.04 <sup>a</sup>  | 1.66±<br>0.03 <sup>a</sup>  |
|      |                 | <b>Mean</b>    | <b>1.81<sup>c</sup></b>     | <b>1.77<sup>b</sup></b>     | <b>1.66<sup>b</sup></b>     | <b>1.84<sup>c</sup></b>     | <b>1.80<sup>b</sup></b>     | <b>1.68<sup>b</sup></b>     |
|      | <i>F</i> -Value | D              | 69.01 <sup>**</sup>         | 89.37 <sup>**</sup>         | 18.12 <sup>**</sup>         | 96.77 <sup>**</sup>         | 27.95 <sup>**</sup>         | 22.13 <sup>**</sup>         |
|      |                 | R              | 6.80 <sup>**</sup>          | 6.95 <sup>**</sup>          | 2.65 <sup>ns</sup>          | 12.35 <sup>**</sup>         | 1.87 <sup>ns</sup>          | 3.04 <sup>ns</sup>          |
|      |                 | D×R            | 1.66 <sup>ns</sup>          | 1.91 <sup>ns</sup>          | 0.45 <sup>ns</sup>          | 2.36 <sup>ns</sup>          | 0.66 <sup>ns</sup>          | 0.34 <sup>ns</sup>          |

Note: Values represent the average ± the standard error. Values represent the average ± the standard error. The means of treatments were compared based on the Tukey test at a probability level of 0.05. In the same year, different lowercase letters indicate a significant difference. <sup>ns</sup>-non-significant. <sup>\*\*</sup> and <sup>\*</sup> indicate a significant level of 0.01 (p < 0.01) and 0.05 (p < 0.05) respectively.

Table S3. Effects of density and row spacing on the internode dry weight (g cm<sup>-1</sup>)

| Year | Density(D)      | Row spacing(R) | Silking stage           |                          |                          | Filling stage            |                         |                         |
|------|-----------------|----------------|-------------------------|--------------------------|--------------------------|--------------------------|-------------------------|-------------------------|
|      |                 |                | 3rd                     | 5th                      | 7th                      | 3rd                      | 5th                     | 7th                     |
| 2017 | 45000           | 60+60          | 5.43±                   | 6.14±                    | 5.49±                    | 5.76±                    | 6.19±                   | 6.88±                   |
|      |                 |                | 0.28 <sup>a</sup>       | 0.19 <sup>a</sup>        | 0.18 <sup>a</sup>        | 0.18 <sup>a</sup>        | 0.17 <sup>a</sup>       | 0.06 <sup>a</sup>       |
|      |                 | 80+40          | 5.26±                   | 5.80±                    | 5.25±                    | 5.02±                    | 5.90±                   | 6.53±                   |
|      |                 |                | 0.46 <sup>a</sup>       | 0.35 <sup>ab</sup>       | 0.04 <sup>ab</sup>       | 0.10 <sup>b</sup>        | 0.11 <sup>a</sup>       | 0.11 <sup>a</sup>       |
|      |                 | 80+80          | 5.22±                   | 5.56±                    | 5.23±                    | 5.01±                    | 5.84±                   | 6.01±                   |
|      |                 |                | 0.37 <sup>a</sup>       | 0.34 <sup>ab</sup>       | 0.11 <sup>ab</sup>       | 0.11 <sup>b</sup>        | 0.17 <sup>a</sup>       | 0.16 <sup>b</sup>       |
|      |                 | 110+50         | 5.15±                   | 5.65±                    | 5.20±                    | 4.99±                    | 5.26±                   | 5.96±                   |
|      |                 |                | 0.48 <sup>a</sup>       | 0.14 <sup>ab</sup>       | 0.06 <sup>ab</sup>       | 0.05 <sup>b</sup>        | 0.07 <sup>b</sup>       | 0.11 <sup>b</sup>       |
|      |                 | 100+100        | 5.11±                   | 5.42±                    | 4.95±                    | 4.84±                    | 5.10±                   | 5.90±                   |
|      |                 |                | 0.22 <sup>a</sup>       | 0.16 <sup>b</sup>        | 0.08 <sup>b</sup>        | 0.19 <sup>b</sup>        | 0.10 <sup>b</sup>       | 0.07 <sup>b</sup>       |
|      |                 | <b>Mean</b>    | <b>5.24<sup>a</sup></b> | <b>5.71<sup>a</sup></b>  | <b>5.22<sup>a</sup></b>  | <b>5.13<sup>a</sup></b>  | <b>5.66<sup>a</sup></b> | <b>6.26<sup>a</sup></b> |
|      | 67500           | 60+60          | 4.94±                   | 5.40±                    | 4.93±                    | 5.14±                    | 4.49±                   | 4.94±                   |
|      |                 |                | 0.37 <sup>a</sup>       | 0.40 <sup>a</sup>        | 0.09 <sup>a</sup>        | 0.19 <sup>a</sup>        | 0.10 <sup>a</sup>       | 0.03 <sup>a</sup>       |
|      |                 | 80+40          | 4.59±                   | 5.04±                    | 4.92±                    | 4.57±                    | 4.31±                   | 4.55±                   |
|      |                 |                | 0.54 <sup>ab</sup>      | 0.21 <sup>ab</sup>       | 0.08 <sup>a</sup>        | 0.13 <sup>ab</sup>       | 0.15 <sup>a</sup>       | 0.09 <sup>ab</sup>      |
|      |                 | 80+80          | 4.53±                   | 5.08±                    | 4.72±                    | 4.53±                    | 4.51±                   | 4.47±                   |
|      |                 |                | 0.45 <sup>ab</sup>      | 0.14 <sup>ab</sup>       | 0.10 <sup>a</sup>        | 0.10 <sup>bc</sup>       | 0.09 <sup>a</sup>       | 0.06 <sup>b</sup>       |
|      |                 | 110+50         | 4.07±                   | 4.56±                    | 4.20±                    | 4.18±                    | 4.30±                   | 4.45±                   |
|      |                 |                | 0.21 <sup>bc</sup>      | 0.21 <sup>bc</sup>       | 0.29 <sup>b</sup>        | 0.24 <sup>bc</sup>       | 0.07 <sup>a</sup>       | 0.07 <sup>b</sup>       |
|      |                 | 100+100        | 3.90±                   | 4.45±                    | 4.10±                    | 4.07±                    | 3.92±                   | 4.33±                   |
|      |                 |                | 0.43 <sup>c</sup>       | 0.16 <sup>bc</sup>       | 0.03 <sup>b</sup>        | 0.18 <sup>c</sup>        | 0.08 <sup>a</sup>       | 0.01 <sup>b</sup>       |
|      |                 | <b>Mean</b>    | <b>4.41<sup>b</sup></b> | <b>4.91<sup>b</sup></b>  | <b>4.57<sup>b</sup></b>  | <b>4.50<sup>b</sup></b>  | <b>4.31<sup>b</sup></b> | <b>4.55<sup>b</sup></b> |
|      | <i>F</i> -Value | D              | 103.56**                | 81.62*                   | 27.50*                   | 99.23**                  | 311.88**                | 4616.04**               |
|      |                 | R              | 4.78**                  | 8.32**                   | 10.43**                  | 14.65**                  | 14.62**                 | 18.20**                 |
|      |                 | D×R            | 1.49 <sup>ns</sup>      | 1.09 <sup>ns</sup>       | 2.40 <sup>ns</sup>       | 0.66 <sup>ns</sup>       | 0.83 <sup>ns</sup>      | 2.25 <sup>ns</sup>      |
| 2018 | 45000           | 60+60          | 4.29±                   | 6.69±                    | 6.31±                    | 4.94±                    | 7.45±                   | 6.67±                   |
|      |                 |                | 0.18 <sup>a</sup>       | 0.18 <sup>a</sup>        | 0.16 <sup>a</sup>        | 0.14 <sup>a</sup>        | 0.05 <sup>a</sup>       | 0.05 <sup>a</sup>       |
|      |                 | 80+40          | 3.82±                   | 6.03±                    | 5.80±                    | 4.35±                    | 7.32±                   | 6.40±                   |
|      |                 |                | 0.04 <sup>ab</sup>      | 0.40 <sup>b</sup>        | 0.20 <sup>a</sup>        | 0.16 <sup>b</sup>        | 0.05 <sup>a</sup>       | 0.07 <sup>a</sup>       |
|      |                 | 80+80          | 4.02±                   | 6.53±                    | 6.08±                    | 4.17±                    | 7.32±                   | 6.31±                   |
|      |                 |                | 0.02 <sup>bc</sup>      | 0.33 <sup>a</sup>        | 0.18 <sup>a</sup>        | 0.28 <sup>bc</sup>       | 0.19 <sup>a</sup>       | 0.07 <sup>a</sup>       |
|      |                 | 110+50         | 3.76±                   | 6.01±                    | 5.76±                    | 4.08±                    | 6.95±                   | 6.27±                   |
|      |                 |                | 0.10 <sup>c</sup>       | 0.03 <sup>b</sup>        | 0.07 <sup>a</sup>        | 0.17 <sup>c</sup>        | 0.13 <sup>b</sup>       | 0.12 <sup>a</sup>       |
|      |                 | <b>Mean</b>    | <b>3.97<sup>a</sup></b> | <b>6.31<sup>a</sup></b>  | <b>5.99<sup>a</sup></b>  | <b>4.39<sup>a</sup></b>  | <b>7.26<sup>a</sup></b> | <b>6.41<sup>a</sup></b> |
|      | 67500           | 60+60          | 3.98±                   | 6.01±                    | 5.81±                    | 4.25±                    | 6.62±                   | 5.82±                   |
|      |                 |                | 0.29 <sup>a</sup>       | 0.23 <sup>a</sup>        | 0.30 <sup>a</sup>        | 0.11 <sup>a</sup>        | 0.03 <sup>a</sup>       | 0.21 <sup>a</sup>       |
|      |                 | 80+40          | 3.45±                   | 5.93±                    | 5.36±                    | 3.90±                    | 6.11±                   | 5.48±                   |
|      |                 |                | 0.09 <sup>ab</sup>      | 0.11 <sup>a</sup>        | 0.12 <sup>a</sup>        | 0.07 <sup>b</sup>        | 0.06 <sup>b</sup>       | 0.16 <sup>a</sup>       |
|      |                 | 80+80          | 3.59±                   | 5.97±                    | 5.87±                    | 4.17±                    | 6.02±                   | 5.70±                   |
|      |                 |                | 0.10 <sup>b</sup>       | 0.04 <sup>a</sup>        | 0.22 <sup>a</sup>        | 0.19 <sup>ab</sup>       | 0.05 <sup>b</sup>       | 0.14 <sup>a</sup>       |
|      |                 | 110+50         | 3.43±                   | 5.76±                    | 5.29±                    | 4.01±                    | 5.98±                   | 5.41±                   |
|      |                 |                | 0.03 <sup>b</sup>       | 0.10 <sup>a</sup>        | 0.10 <sup>a</sup>        | 0.16 <sup>ab</sup>       | 0.05 <sup>b</sup>       | 0.02 <sup>a</sup>       |
|      |                 | <b>Mean</b>    | <b>3.61<sup>b</sup></b> | <b>5.92<sup>ab</sup></b> | <b>5.58<sup>ab</sup></b> | <b>4.08<sup>ab</sup></b> | <b>6.18<sup>b</sup></b> | <b>5.60<sup>b</sup></b> |
|      | 90000           | 60+60          | 3.22±                   | 4.71±                    | 4.95±                    | 3.89±                    | 5.62±                   | 5.12±                   |
|      |                 |                | 0.09 <sup>a</sup>       | 0.30 <sup>bc</sup>       | 0.43 <sup>a</sup>        | 0.12 <sup>a</sup>        | 0.18 <sup>ab</sup>      | 0.14 <sup>ab</sup>      |
|      |                 | 80+40          | 3.13±                   | 4.48±                    | 4.62±                    | 3.79±                    | 5.38±                   | 4.83±                   |
|      |                 |                | 0.10 <sup>a</sup>       | 0.48 <sup>c</sup>        | 0.07 <sup>a</sup>        | 0.00 <sup>a</sup>        | 0.12 <sup>b</sup>       | 0.08 <sup>b</sup>       |
|      |                 | 80+80          | 3.41±                   | 5.34±                    | 5.15±                    | 3.74±                    | 5.83±                   | 5.32±                   |
|      |                 |                | 0.12 <sup>a</sup>       | 0.45 <sup>ab</sup>       | 0.12 <sup>a</sup>        | 0.12 <sup>a</sup>        | 0.09 <sup>a</sup>       | 0.02 <sup>ab</sup>      |
|      |                 | 110+50         | 3.36±                   | 5.56±                    | 5.19±                    | 3.86±                    | 5.89±                   | 5.36±                   |
|      |                 |                | 0.21 <sup>a</sup>       | 0.42 <sup>a</sup>        | 0.08 <sup>a</sup>        | 0.12 <sup>a</sup>        | 0.09 <sup>a</sup>       | 0.26 <sup>a</sup>       |
|      |                 | <b>Mean</b>    | <b>3.28<sup>c</sup></b> | <b>5.02<sup>b</sup></b>  | <b>4.98<sup>b</sup></b>  | <b>3.82<sup>b</sup></b>  | <b>5.68<sup>b</sup></b> | <b>5.16<sup>c</sup></b> |
|      | <i>F</i> -Value | D              | 73.57**                 | 11.30*                   | 14.37*                   | 18.58**                  | 45.79**                 | 83.00**                 |
|      |                 | R              | 6.93**                  | 3.95*                    | 3.83*                    | 9.21**                   | 9.85**                  | 2.01 <sup>ns</sup>      |
|      |                 | D×R            | 2.51 <sup>ns</sup>      | 4.82**                   | 1.13 <sup>ns</sup>       | 4.23**                   | 11.45**                 | 1.59 <sup>ns</sup>      |

Note: Values represent the average ± the standard error. The means of treatments were compared based on the Tukey test at a probability level of 0.05. In the same year, different lowercase letters indicate a significant difference. <sup>ns</sup>-non-significant. \*\* and \* indicate a significant level of 0.01 (p < 0.01) and 0.05 (p < 0.05) respectively.

**Table S4.** Effects of density and row spacing on the internode length stem density (g cm<sup>-1</sup>)

| Year | Density(D)      | Row spacing(R) | Silking stage               |                             |                             | Filling stage               |                             |                             |
|------|-----------------|----------------|-----------------------------|-----------------------------|-----------------------------|-----------------------------|-----------------------------|-----------------------------|
|      |                 |                | 3 <sup>rd</sup>             | 5 <sup>th</sup>             | 7 <sup>th</sup>             | 3 <sup>rd</sup>             | 5 <sup>th</sup>             | 7 <sup>th</sup>             |
| 2017 | 45000           | 60+60          | 0.59±<br>0.01 <sup>a</sup>  | 0.46±<br>0.02 <sup>a</sup>  | 0.34±<br>0.02 <sup>a</sup>  | 0.70±<br>0.02 <sup>a</sup>  | 0.47±<br>0.04 <sup>a</sup>  | 0.44±<br>0.01 <sup>a</sup>  |
|      |                 | 80+40          | 0.52±0.03 <sup>bc</sup>     | 0.42±0.02 <sup>ab</sup>     | 0.32±0.01 <sup>a</sup>      | 0.60±0.01 <sup>ab</sup>     | 0.42±0.05 <sup>a</sup>      | 0.41±0.03 <sup>ab</sup>     |
|      |                 | 80+80          | 0.58±<br>0.02 <sup>ab</sup> | 0.42±<br>0.01 <sup>ab</sup> | 0.32±<br>0.01 <sup>a</sup>  | 0.57±<br>0.01 <sup>bc</sup> | 0.42±<br>0.04 <sup>a</sup>  | 0.37±<br>0.01 <sup>b</sup>  |
|      |                 | 110+50         | 0.53±<br>0.01 <sup>bc</sup> | 0.38±<br>0.01 <sup>b</sup>  | 0.32±<br>0.01 <sup>a</sup>  | 0.51±<br>0.02 <sup>c</sup>  | 0.34±<br>0.00 <sup>b</sup>  | 0.37±<br>0.02 <sup>b</sup>  |
|      |                 | 100+100        | 0.51±<br>0.02 <sup>c</sup>  | 0.37±<br>0.01 <sup>b</sup>  | 0.30±<br>0.01 <sup>a</sup>  | 0.49±<br>0.02 <sup>c</sup>  | 0.32±<br>0.00 <sup>b</sup>  | 0.36±<br>0.02 <sup>b</sup>  |
|      |                 | <b>Mean</b>    | <b>0.55a</b>                | <b>0.41a</b>                | <b>0.32 a</b>               | <b>0.57 a</b>               | <b>0.39 a</b>               | <b>0.39 a</b>               |
|      | 67500           | 60+60          | 0.44±<br>0.02 <sup>a</sup>  | 0.39±<br>0.04 <sup>a</sup>  | 0.29±<br>0.01 <sup>a</sup>  | 0.55±<br>0.01 <sup>a</sup>  | 0.30±<br>0.01 <sup>a</sup>  | 0.30±<br>0.00 <sup>a</sup>  |
|      |                 | 80+40          | 0.42±<br>0.02 <sup>ab</sup> | 0.33±<br>0.02 <sup>ab</sup> | 0.29±<br>0.02 <sup>a</sup>  | 0.44±<br>0.06 <sup>ab</sup> | 0.27±<br>0.01 <sup>a</sup>  | 0.27±<br>0.02 <sup>a</sup>  |
|      |                 | 80+80          | 0.40±<br>0.01 <sup>ab</sup> | 0.33±<br>0.02 <sup>ab</sup> | 0.27±<br>0.01 <sup>ab</sup> | 0.42±<br>0.03 <sup>b</sup>  | 0.29±<br>0.01 <sup>a</sup>  | 0.26±<br>0.02 <sup>a</sup>  |
|      |                 | 110+50         | 0.34±<br>0.04 <sup>bc</sup> | 0.29±<br>0.01 <sup>b</sup>  | 0.24±<br>0.02 <sup>ab</sup> | 0.38±<br>0.05 <sup>b</sup>  | 0.27±<br>0.01 <sup>a</sup>  | 0.26±<br>0.02 <sup>a</sup>  |
|      |                 | 100+100        | 0.32±<br>0.01 <sup>c</sup>  | 0.28±<br>0.01 <sup>b</sup>  | 0.23±<br>0.00 <sup>b</sup>  | 0.36±<br>0.04 <sup>b</sup>  | 0.23±<br>0.01 <sup>a</sup>  | 0.24±<br>0.00 <sup>a</sup>  |
|      |                 | <b>Mean</b>    | <b>0.38 b</b>               | <b>0.33 b</b>               | <b>0.26 b</b>               | <b>0.43 b</b>               | <b>0.27 b</b>               | <b>0.26 b</b>               |
|      | <i>F</i> -Value | D              | 1061.68**                   | 59.72*                      | 50.87*                      | 18.77*                      | 62.78*                      | 2627.97**                   |
|      |                 | R              | 7.29**                      | 8.71**                      | 4.34*                       | 18.35**                     | 6.88**                      | 4.36*                       |
|      |                 | D×R            | 1.62 <sup>ns</sup>          | 0.05 <sup>ns</sup>          | 0.77 <sup>ns</sup>          | 0.21 <sup>ns</sup>          | 1.59 <sup>ns</sup>          | 0.38 <sup>ns</sup>          |
| 2018 | 45000           | 60+60          | 0.52±<br>0.03 <sup>a</sup>  | 0.40±<br>0.01 <sup>a</sup>  | 0.34±<br>0.02 <sup>a</sup>  | 0.59±<br>0.03 <sup>a</sup>  | 0.42±<br>0.01 <sup>a</sup>  | 0.33±<br>0.00 <sup>a</sup>  |
|      |                 | 80+40          | 0.45±<br>0.03 <sup>a</sup>  | 0.33±<br>0.01 <sup>bc</sup> | 0.30±<br>0.01 <sup>ab</sup> | 0.48±<br>0.03 <sup>b</sup>  | 0.41±<br>0.02 <sup>a</sup>  | 0.31±<br>0.01 <sup>ab</sup> |
|      |                 | 80+80          | 0.51±<br>0.01 <sup>ab</sup> | 0.36±<br>0.02 <sup>b</sup>  | 0.31±<br>0.01 <sup>ab</sup> | 0.47±<br>0.05 <sup>b</sup>  | 0.40±<br>0.01 <sup>a</sup>  | 0.31±<br>0.00 <sup>ab</sup> |
|      |                 | 110+50         | 0.43±<br>0.01 <sup>b</sup>  | 0.32±<br>0.01 <sup>c</sup>  | 0.29±<br>0.00 <sup>b</sup>  | 0.44±<br>0.02 <sup>b</sup>  | 0.37±<br>0.01 <sup>b</sup>  | 0.30±<br>0.01 <sup>b</sup>  |
|      |                 | <b>Mean</b>    | <b>0.48 a</b>               | <b>0.35 a</b>               | <b>0.31 a</b>               | <b>0.50 a</b>               | <b>0.40 a</b>               | <b>0.31 a</b>               |
|      | 67500           | 60+60          | 0.46±<br>0.03 <sup>a</sup>  | 0.33±<br>0.01 <sup>a</sup>  | 0.30±<br>0.01 <sup>a</sup>  | 0.45±<br>0.00 <sup>a</sup>  | 0.35±<br>0.01 <sup>a</sup>  | 0.28±<br>0.01 <sup>a</sup>  |
|      |                 | 80+40          | 0.39±<br>0.02 <sup>a</sup>  | 0.32±<br>0.01 <sup>a</sup>  | 0.27±<br>0.00 <sup>ab</sup> | 0.40±<br>0.01 <sup>a</sup>  | 0.33±<br>0.01 <sup>ab</sup> | 0.27±<br>0.02 <sup>ab</sup> |
|      |                 | 80+80          | 0.40±<br>0.01 <sup>a</sup>  | 0.33±<br>0.01 <sup>a</sup>  | 0.29±<br>0.01 <sup>ab</sup> | 0.42±<br>0.03 <sup>a</sup>  | 0.32±<br>0.01 <sup>ab</sup> | 0.27±<br>0.01 <sup>ab</sup> |
|      |                 | 110+50         | 0.38±<br>0.01 <sup>a</sup>  | 0.31±<br>0.01 <sup>a</sup>  | 0.26±<br>0.00 <sup>b</sup>  | 0.39±<br>0.02 <sup>a</sup>  | 0.31±<br>0.01 <sup>b</sup>  | 0.25±<br>0.00 <sup>b</sup>  |
|      |                 | <b>Mean</b>    | <b>0.41 b</b>               | <b>0.32 ab</b>              | <b>0.28 b</b>               | <b>0.42 b</b>               | <b>0.33 b</b>               | <b>0.27 b</b>               |
|      | 90000           | 60+60          | 0.34±<br>0.03 <sup>a</sup>  | 0.26±<br>0.02 <sup>ab</sup> | 0.23±<br>0.02 <sup>a</sup>  | 0.40±<br>0.02 <sup>a</sup>  | 0.30±<br>0.00 <sup>a</sup>  | 0.24±<br>0.01 <sup>a</sup>  |
|      |                 | 80+40          | 0.31±<br>0.01 <sup>a</sup>  | 0.24±<br>0.03 <sup>b</sup>  | 0.21±<br>0.00 <sup>a</sup>  | 0.36±<br>0.01 <sup>a</sup>  | 0.27±<br>0.01 <sup>a</sup>  | 0.22±<br>0.00 <sup>b</sup>  |
|      |                 | 80+80          | 0.34±<br>0.02 <sup>a</sup>  | 0.28±<br>0.02 <sup>a</sup>  | 0.23±<br>0.00 <sup>a</sup>  | 0.34±<br>0.01 <sup>a</sup>  | 0.29±<br>0.00 <sup>a</sup>  | 0.24±<br>0.00 <sup>a</sup>  |
|      |                 | 110+50         | 0.34±<br>0.01 <sup>a</sup>  | 0.29±<br>0.02 <sup>a</sup>  | 0.24±<br>0.00 <sup>a</sup>  | 0.37±<br>0.00 <sup>a</sup>  | 0.30±<br>0.01 <sup>a</sup>  | 0.24±<br>0.01 <sup>a</sup>  |
|      |                 | <b>Mean</b>    | <b>0.33 c</b>               | <b>0.27 b</b>               | <b>0.23 c</b>               | <b>0.37 c</b>               | <b>0.29 b</b>               | <b>0.23 c</b>               |
|      | <i>F</i> -Value | D              | 70.84**                     | 9.02*                       | 69.61**                     | 118.57**                    | 53.93**                     | 44.51**                     |
|      |                 | R              | 3.37*                       | 5.40**                      | 4.16*                       | 4.81*                       | 5.06*                       | 2.83 <sup>ns</sup>          |
|      |                 | D×R            | 0.90 <sup>ns</sup>          | 6.32**                      | 1.30 <sup>ns</sup>          | 0.89 <sup>ns</sup>          | 1.65 <sup>ns</sup>          | 1.34 <sup>ns</sup>          |

Note: Values represent the average ± the standard error. The means of treatments were compared based on the Tukey test at a probability level of 0.05. In the same year, different lowercase letters indicate a significant difference. <sup>ns</sup>-non-significant. \*\* and \* indicate a significant level of 0.01 (p < 0.01) and 0.05 (p < 0.05) respectively.

Table S5. Effects of density and row spacing on basal internode lignin content of maize (%)

| Year | Plant density(D) | Row spacing(R) | Silking stage      |                     |                    | Filling stage        |                    |                    |
|------|------------------|----------------|--------------------|---------------------|--------------------|----------------------|--------------------|--------------------|
|      |                  |                | 3 <sup>rd</sup>    | 5 <sup>th</sup>     | 7 <sup>th</sup>    | 3 <sup>rd</sup>      | 5 <sup>th</sup>    | 7 <sup>th</sup>    |
| 2017 | 45000            | 60+60          | 16.87±             | 13.23±              | 12.82±             | 17.23±               | 14.02±             | 12.45±             |
|      |                  |                | 0.41 <sup>a</sup>  | 0.35 <sup>a</sup>   | 0.37 <sup>a</sup>  | 0.33 <sup>a</sup>    | 0.54 <sup>a</sup>  | 0.00 <sup>a</sup>  |
|      |                  | 80+40          | 15.49±             | 11.47±              | 10.48±             | 16.86±               | 13.71±             | 12.37±             |
|      |                  |                | 0.48 <sup>ab</sup> | 0.32 <sup>b</sup>   | 0.26 <sup>bc</sup> | 0.04 <sup>a</sup>    | 0.54 <sup>a</sup>  | 0.06 <sup>ab</sup> |
|      |                  | 80+80          | 15.19±             | 13.03±              | 11.50±             | 16.67±               | 13.71±             | 12.40±             |
|      |                  |                | 0.38 <sup>ab</sup> | 0.16 <sup>a</sup>   | 0.27 <sup>ab</sup> | 0.37 <sup>a</sup>    | 0.26 <sup>a</sup>  | 0.04 <sup>ab</sup> |
|      |                  | 110+50         | 15.23±             | 11.14±              | 10.44±             | 16.34±               | 13.48±             | 12.10±             |
|      |                  |                | 0.33 <sup>ab</sup> | 0.39 <sup>bc</sup>  | 0.16 <sup>bc</sup> | 0.27 <sup>a</sup>    | 0.13 <sup>a</sup>  | 0.23 <sup>bc</sup> |
|      |                  | 100+100        | 14.76±             | 10.09±              | 9.99±              | 16.07±               | 13.37±             | 11.43±             |
|      |                  |                | 0.33 <sup>b</sup>  | 0.36 <sup>c</sup>   | 0.12 <sup>c</sup>  | 0.20 <sup>a</sup>    | 0.26 <sup>a</sup>  | 0.48 <sup>c</sup>  |
|      |                  | <b>Mean</b>    | <b>15.51a</b>      | <b>11.79 a</b>      | <b>11.05 a</b>     | <b>16.63 a</b>       | <b>13.66 a</b>     | <b>12.15 a</b>     |
|      | 67500            | 60+60          | 12.76±             | 10.60±              | 8.81±              | 14.68±               | 12.72±             | 10.03±             |
|      |                  |                | 0.41 <sup>a</sup>  | 0.57 <sup>a</sup>   | 0.59 <sup>a</sup>  | 0.37 <sup>a</sup>    | 0.41 <sup>a</sup>  | 0.08 <sup>a</sup>  |
|      |                  | 80+40          | 12.17±             | 10.23±              | 8.75±              | 14.06±               | 12.44±             | 9.87±              |
|      |                  |                | 0.43 <sup>a</sup>  | 0.39 <sup>ab</sup>  | 0.31 <sup>a</sup>  | 0.17 <sup>a</sup>    | 0.26 <sup>ab</sup> | 0.02 <sup>a</sup>  |
|      |                  | 80+80          | 12.13±             | 10.09±              | 8.74±              | 13.79±               | 11.83±             | 10.06±             |
|      |                  |                | 0.48 <sup>a</sup>  | 0.22 <sup>ab</sup>  | 0.14 <sup>a</sup>  | 0.38 <sup>a</sup>    | 0.19 <sup>ab</sup> | 0.13 <sup>a</sup>  |
|      |                  | 110+50         | 11.69±             | 9.38±               | 8.47±              | 13.25±               | 11.49±             | 9.64±              |
|      |                  |                | 0.51 <sup>a</sup>  | 0.29 <sup>bc</sup>  | 0.42 <sup>a</sup>  | 0.60 <sup>a</sup>    | 0.04 <sup>b</sup>  | 0.28 <sup>a</sup>  |
|      |                  | 100+100        | 11.63±             | 8.98±               | 7.90±              | 13.15±               | 11.70±             | 9.11±              |
|      |                  |                | 0.45 <sup>a</sup>  | 0.26 <sup>c</sup>   | 0.43 <sup>a</sup>  | 0.56 <sup>a</sup>    | 0.14 <sup>b</sup>  | 0.33 <sup>a</sup>  |
|      |                  | <b>Mean</b>    | <b>12.08 b</b>     | <b>9.86 a</b>       | <b>8.53 b</b>      | <b>13.79 b</b>       | <b>12.04 a</b>     | <b>9.74 b</b>      |
|      |                  | CV(%)          | 6.65               | 6.61                | 6.90               | 4.79                 | 4.47               | 3.33               |
|      | <i>F</i> -Value  | D              | 140.91**           | 13.18 <sup>ns</sup> | 1375.62**          | 158.73 <sup>ns</sup> | 8.13 <sup>ns</sup> | 158.64**           |
|      |                  | R              | 2.92 <sup>ns</sup> | 15.39**             | 6.92**             | 2.78**               | 4.11*              | 7.05**             |
|      |                  | D×R            | 0.33 <sup>ns</sup> | 2.79 <sup>ns</sup>  | 2.91 <sup>ns</sup> | 0.09 <sup>ns</sup>   | 0.90 <sup>ns</sup> | 0.07 <sup>ns</sup> |
| 2018 | 45000            | 60+60          | 14.74±             | 11.67±              | 11.35±             | 15.02±               | 13.39±             | 12.20±             |
|      |                  |                | 0.22 <sup>a</sup>  | 0.20 <sup>a</sup>   | 0.33 <sup>a</sup>  | 0.46 <sup>a</sup>    | 0.27 <sup>a</sup>  | 0.29 <sup>a</sup>  |
|      |                  | 80+40          | 13.11±             | 11.27±              | 10.65±             | 14.84±               | 12.55±             | 11.54±             |
|      |                  |                | 0.34 <sup>b</sup>  | 0.09 <sup>a</sup>   | 0.32 <sup>a</sup>  | 0.33 <sup>ab</sup>   | 0.25 <sup>ab</sup> | 0.31 <sup>a</sup>  |
|      |                  | 80+80          | 12.28±             | 10.06±              | 9.56±              | 14.30±               | 12.73±             | 11.69±             |
|      |                  |                | 0.31 <sup>b</sup>  | 0.12 <sup>b</sup>   | 0.27 <sup>b</sup>  | 0.23 <sup>ab</sup>   | 0.32 <sup>ab</sup> | 0.30 <sup>a</sup>  |
|      |                  | 110+50         | 12.21±             | 10.04±              | 9.53±              | 14.03±               | 12.15±             | 11.58±             |
|      |                  |                | 0.41 <sup>b</sup>  | 0.33 <sup>b</sup>   | 0.23 <sup>b</sup>  | 0.38 <sup>b</sup>    | 0.11 <sup>b</sup>  | 0.28 <sup>a</sup>  |
|      |                  | <b>Mean</b>    | <b>13.08 a</b>     | <b>10.76 a</b>      | <b>10.27 a</b>     | <b>14.55 a</b>       | <b>12.71 a</b>     | <b>11.75 a</b>     |
|      | 67500            | 60+60          | 11.98±             | 10.75±              | 9.50±              | 14.83±               | 12.52±             | 11.26±             |
|      |                  |                | 0.28 <sup>a</sup>  | 0.19 <sup>a</sup>   | 0.15 <sup>a</sup>  | 0.26 <sup>a</sup>    | 0.35 <sup>a</sup>  | 0.26 <sup>a</sup>  |
|      |                  | 80+40          | 11.66±             | 10.60±              | 9.28±              | 14.13±               | 12.50±             | 9.94±              |
|      |                  |                | 0.26 <sup>ab</sup> | 0.42 <sup>a</sup>   | 0.13 <sup>ab</sup> | 0.32 <sup>a</sup>    | 0.31 <sup>a</sup>  | 0.36 <sup>b</sup>  |
|      |                  | 80+80          | 10.6±              | 10.22±              | 8.40±              | 12.96±               | 10.74±             | 10.08±             |
|      |                  |                | 0.47 <sup>b</sup>  | 0.24 <sup>a</sup>   | 0.14 <sup>bc</sup> | 0.30 <sup>b</sup>    | 0.29 <sup>b</sup>  | 0.23 <sup>ab</sup> |
|      |                  | 110+50         | 11.42±             | 10.07±              | 8.30±              | 12.80±               | 11.16±             | 10.01±             |
|      |                  |                | 0.41 <sup>ab</sup> | 0.16 <sup>a</sup>   | 0.31 <sup>c</sup>  | 0.27 <sup>b</sup>    | 0.37 <sup>b</sup>  | 0.42 <sup>b</sup>  |
|      |                  | <b>Mean</b>    | <b>11.42 b</b>     | <b>10.41 a</b>      | <b>8.87 b</b>      | <b>13.68 b</b>       | <b>11.73 b</b>     | <b>10.32 b</b>     |
|      | 90000            | 60+60          | 11.76±             | 10.04±              | 8.39±              | 11.13±               | 12.09±             | 9.81±              |
|      |                  |                | 0.27 <sup>a</sup>  | 0.19 <sup>a</sup>   | 0.26 <sup>a</sup>  | 0.45 <sup>a</sup>    | 0.11 <sup>a</sup>  | 0.21 <sup>a</sup>  |
|      |                  | 80+40          | 10.70±             | 9.19±               | 8.33±              | 11.72±               | 10.17±             | 9.20±              |
|      |                  |                | 0.16 <sup>ab</sup> | 0.15 <sup>a</sup>   | 0.38 <sup>a</sup>  | 0.22 <sup>a</sup>    | 0.20 <sup>b</sup>  | 0.38 <sup>a</sup>  |
|      |                  | 80+80          | 9.86±              | 9.14±               | 7.26±              | 10.86±               | 9.72±              | 8.00±              |
|      |                  |                | 0.35 <sup>b</sup>  | 0.42 <sup>a</sup>   | 0.21 <sup>b</sup>  | 0.41 <sup>a</sup>    | 0.26 <sup>b</sup>  | 0.29 <sup>b</sup>  |
|      |                  | 110+50         | 11.07±             | 9.41±               | 8.19±              | 11.70±               | 10.73±             | 9.07±              |
|      |                  |                | 0.33 <sup>ab</sup> | 0.35 <sup>a</sup>   | 0.36 <sup>a</sup>  | 0.21 <sup>a</sup>    | 0.32 <sup>b</sup>  | 0.28 <sup>a</sup>  |
|      |                  | <b>Mean</b>    | <b>10.85 b</b>     | <b>9.44 b</b>       | <b>8.04 b</b>      | <b>11.35 c</b>       | <b>10.68 c</b>     | <b>9.02 c</b>      |
|      |                  | CV(%)          | 5.80               | 5.04                | 6.10               | 5.24                 | 4.84               | 6.26               |
|      | <i>F</i> -Value  | D              | 51.81**            | 15.91*              | 35.66**            | 103.16**             | 177.88**           | 321.16**           |
|      |                  | R              | 12.09**            | 9.09**              | 15.42**            | 6.73**               | 14.04**            | 8.15**             |
|      |                  | D×R            | 1.50 <sup>ns</sup> | 1.84 <sup>ns</sup>  | 1.69 <sup>ns</sup> | 2.91*                | 3.34*              | 1.58 <sup>ns</sup> |

Note: Values represent the average ± the standard error. The means of treatments were compared based on the Tukey test at a probability level of 0.05. In the same year, different lowercase letters indicate a significant difference. <sup>ns</sup>-non-significant. \*\* and \* indicate a significant level of 0.01 (p < 0.01) and 0.05 (p < 0.05) respectively.

Table S6. Effects of density and row spacing on basal internode cellulose content of maize (%)

| Year | Plant density(D) | Row spacing(R) | Silking stage            |                          |                          | Filling stage            |                          |                          |
|------|------------------|----------------|--------------------------|--------------------------|--------------------------|--------------------------|--------------------------|--------------------------|
|      |                  |                | 3 <sup>rd</sup>          | 5 <sup>th</sup>          | 7 <sup>th</sup>          | 3 <sup>rd</sup>          | 5 <sup>th</sup>          | 7 <sup>th</sup>          |
| 2017 | 45000            | 60+60          | 30.37±                   | 25.80±                   | 25.53±                   | 31.60±                   | 30.43±                   | 29.51±                   |
|      |                  |                | 0.57 <sup>a</sup>        | 0.31 <sup>a</sup>        | 0.09 <sup>a</sup>        | 0.49 <sup>a</sup>        | 0.31 <sup>a</sup>        | 0.32 <sup>a</sup>        |
|      |                  | 80+40          | 26.84±                   | 25.65±                   | 25.01±                   | 31.29±                   | 26.26±                   | 26.83±                   |
|      |                  |                | 0.80 <sup>b</sup>        | 0.73 <sup>a</sup>        | 0.49 <sup>a</sup>        | 0.51 <sup>a</sup>        | 0.42 <sup>c</sup>        | 0.22 <sup>b</sup>        |
|      |                  | 80+80          | 24.73±                   | 24.55±                   | 20.40±                   | 26.90±                   | 22.98±                   | 25.95±                   |
|      |                  |                | 0.20 <sup>c</sup>        | 0.67 <sup>ab</sup>       | 0.40 <sup>b</sup>        | 0.39 <sup>b</sup>        | 0.20 <sup>d</sup>        | 0.33 <sup>b</sup>        |
|      |                  | 110+50         | 23.97±                   | 23.37±                   | 21.34±                   | 23.18±                   | 27.17±                   | 23.94±                   |
|      |                  |                | 0.59 <sup>c</sup>        | 0.21 <sup>bc</sup>       | 0.23 <sup>b</sup>        | 0.45 <sup>c</sup>        | 0.21 <sup>b</sup>        | 0.26 <sup>c</sup>        |
|      |                  | 100+100        | 23.00±                   | 22.32±                   | 17.57±                   | 27.27±                   | 26.69±                   | 22.41±                   |
|      |                  |                | 0.63 <sup>d</sup>        | 0.21 <sup>c</sup>        | 0.81 <sup>c</sup>        | 0.30 <sup>b</sup>        | 0.07 <sup>bc</sup>       | 0.24 <sup>d</sup>        |
|      |                  | <b>Mean</b>    | <b>25.78<sup>a</sup></b> | <b>24.34<sup>a</sup></b> | <b>21.97<sup>a</sup></b> | <b>28.05<sup>a</sup></b> | <b>26.71<sup>a</sup></b> | <b>25.73<sup>a</sup></b> |
|      | 67500            | 60+60          | 26.74±                   | 24.24±                   | 20.49±                   | 30.24±                   | 28.84±                   | 24.02±                   |
|      |                  |                | 0.83 <sup>a</sup>        | 0.29 <sup>a</sup>        | 0.27 <sup>ab</sup>       | 0.08 <sup>a</sup>        | 0.11 <sup>a</sup>        | 0.24 <sup>a</sup>        |
|      |                  | 80+40          | 20.90±                   | 19.33±                   | 21.99±                   | 27.69±                   | 23.88±                   | 23.73±                   |
|      |                  |                | 0.54 <sup>d</sup>        | 0.21 <sup>c</sup>        | 0.11 <sup>a</sup>        | 0.24 <sup>b</sup>        | 0.06 <sup>c</sup>        | 0.36 <sup>a</sup>        |
|      |                  | 80+80          | 25.06±                   | 22.81±                   | 19.87±                   | 25.57±                   | 25.73±                   | 23.77±                   |
|      |                  |                | 0.83 <sup>b</sup>        | 0.27 <sup>ab</sup>       | 0.20 <sup>b</sup>        | 0.32 <sup>c</sup>        | 0.13 <sup>d</sup>        | 0.25 <sup>a</sup>        |
|      |                  | 110+50         | 25.54±                   | 18.64±                   | 19.56±                   | 21.36±                   | 21.87±                   | 20.74±                   |
|      |                  |                | 0.44 <sup>ab</sup>       | 0.15 <sup>c</sup>        | 0.43 <sup>b</sup>        | 0.48 <sup>d</sup>        | 0.11 <sup>b</sup>        | 0.21 <sup>b</sup>        |
|      |                  | 100+100        | 22.21±                   | 22.00±                   | 17.17±                   | 24.05±                   | 23.92±                   | 20.54±                   |
|      |                  |                | 0.64 <sup>c</sup>        | 0.49 <sup>b</sup>        | 0.42 <sup>c</sup>        | 0.32 <sup>c</sup>        | 0.13 <sup>c</sup>        | 0.21 <sup>b</sup>        |
|      |                  | <b>Mean</b>    | <b>24.09<sup>b</sup></b> | <b>21.41<sup>b</sup></b> | <b>19.82<sup>b</sup></b> | <b>25.78<sup>b</sup></b> | <b>24.85<sup>b</sup></b> | <b>22.56<sup>b</sup></b> |
|      |                  | CV(%)          | 5.18                     | 3.21                     | 3.70                     | 2.90                     | 1.43                     | 2.32                     |
|      | <i>F</i> -Value  | D              | 83.05*                   | 166.14**                 | 587.07**                 | 826.86**                 | 0.36 <sup>ns</sup>       | 1299.68**                |
|      |                  | R              | 113.50**                 | 18.18**                  | 79.03**                  | 93.55**                  | 1.64 <sup>ns</sup>       | 73.05**                  |
|      |                  | D×R            | 53.87**                  | 12.00**                  | 12.06**                  | 2.32 <sup>ns</sup>       | 0.82 <sup>ns</sup>       | 7.71**                   |
| 2018 | 45000            | 60+60          | 28.14±                   | 24.98±                   | 20.40±                   | 29.05±                   | 26.01±                   | 24.55±                   |
|      |                  |                | 0.40 <sup>a</sup>        | 0.45 <sup>a</sup>        | 0.48 <sup>a</sup>        | 0.32 <sup>a</sup>        | 0.13 <sup>a</sup>        | 0.35 <sup>a</sup>        |
|      |                  | 80+40          | 26.11±                   | 23.95±                   | 19.05±                   | 26.27±                   | 24.36±                   | 24.38±                   |
|      |                  |                | 0.26 <sup>b</sup>        | 0.34 <sup>a</sup>        | 0.48 <sup>ab</sup>       | 0.48 <sup>b</sup>        | 0.42 <sup>b</sup>        | 0.40 <sup>a</sup>        |
|      |                  | 80+80          | 25.91±                   | 22.59±                   | 18.41±                   | 25.58±                   | 22.02±                   | 22.33±                   |
|      |                  |                | 0.64 <sup>b</sup>        | 0.20 <sup>b</sup>        | 0.43 <sup>b</sup>        | 0.31 <sup>bc</sup>       | 0.42 <sup>c</sup>        | 0.46 <sup>b</sup>        |
|      |                  | 110+50         | 24.59±                   | 21.36±                   | 18.86±                   | 25.15±                   | 23.72±                   | 20.65±                   |
|      |                  |                | 0.71 <sup>c</sup>        | 0.25 <sup>c</sup>        | 0.33 <sup>ab</sup>       | 0.55 <sup>c</sup>        | 0.33 <sup>b</sup>        | 0.50 <sup>c</sup>        |
|      |                  | <b>Mean</b>    | <b>26.19<sup>a</sup></b> | <b>23.22<sup>a</sup></b> | <b>19.18<sup>a</sup></b> | <b>26.51<sup>a</sup></b> | <b>24.03<sup>a</sup></b> | <b>22.98<sup>a</sup></b> |
|      | 67500            | 60+60          | 25.81±                   | 21.70±                   | 18.78±                   | 25.44±                   | 22.71±                   | 21.60±                   |
|      |                  |                | 0.40 <sup>a</sup>        | 0.39 <sup>a</sup>        | 0.57 <sup>a</sup>        | 0.26 <sup>a</sup>        | 0.38 <sup>a</sup>        | 0.25 <sup>a</sup>        |
|      |                  | 80+40          | 22.45±                   | 19.92±                   | 18.23±                   | 24.88±                   | 22.37±                   | 21.56±                   |
|      |                  |                | 0.29 <sup>b</sup>        | 0.53 <sup>b</sup>        | 0.52 <sup>a</sup>        | 0.37 <sup>ab</sup>       | 0.45 <sup>a</sup>        | 0.43 <sup>a</sup>        |
|      |                  | 80+80          | 22.52±                   | 21.40±                   | 18.94±                   | 23.75±                   | 19.28±                   | 20.50±                   |
|      |                  |                | 0.49 <sup>b</sup>        | 0.42 <sup>ab</sup>       | 0.29 <sup>a</sup>        | 0.34 <sup>bc</sup>       | 0.48 <sup>b</sup>        | 0.27 <sup>b</sup>        |
|      |                  | 110+50         | 22.04±                   | 20.87±                   | 18.42±                   | 23.18±                   | 19.91±                   | 20.19±                   |
|      |                  |                | 0.41 <sup>b</sup>        | 0.22 <sup>ab</sup>       | 0.54 <sup>a</sup>        | 0.36 <sup>c</sup>        | 0.20 <sup>b</sup>        | 0.14 <sup>b</sup>        |
|      |                  | <b>Mean</b>    | <b>23.21<sup>b</sup></b> | <b>20.97<sup>b</sup></b> | <b>18.59<sup>a</sup></b> | <b>24.31<sup>b</sup></b> | <b>21.07<sup>b</sup></b> | <b>20.96<sup>b</sup></b> |
|      | 90000            | 60+60          | 23.40±                   | 19.56±                   | 17.39±                   | 22.41±                   | 21.18±                   | 19.90±                   |
|      |                  |                | 0.42 <sup>a</sup>        | 0.58 <sup>a</sup>        | 0.41 <sup>a</sup>        | 0.15 <sup>a</sup>        | 0.40 <sup>a</sup>        | 0.34 <sup>a</sup>        |
|      |                  | 80+40          | 21.76±                   | 18.98±                   | 17.15±                   | 22.05±                   | 19.68±                   | 18.86±                   |
|      |                  |                | 0.35 <sup>ab</sup>       | 0.28 <sup>a</sup>        | 0.16 <sup>a</sup>        | 0.22 <sup>a</sup>        | 0.14 <sup>ab</sup>       | 0.28 <sup>ab</sup>       |
|      |                  | 80+80          | 21.76±                   | 18.92±                   | 17.72±                   | 21.53±                   | 18.58±                   | 18.50±                   |
|      |                  |                | 0.50 <sup>b</sup>        | 0.20 <sup>a</sup>        | 0.26 <sup>a</sup>        | 0.50 <sup>a</sup>        | 0.12 <sup>b</sup>        | 0.31 <sup>b</sup>        |
|      |                  | 110+50         | 22.31±                   | 19.72±                   | 18.13±                   | 22.14±                   | 19.03±                   | 18.96±                   |
|      |                  |                | 0.45 <sup>ab</sup>       | 0.43 <sup>a</sup>        | 0.54 <sup>a</sup>        | 0.38 <sup>a</sup>        | 0.12 <sup>b</sup>        | 0.50 <sup>ab</sup>       |
|      |                  | <b>Mean</b>    | <b>22.31<sup>b</sup></b> | <b>19.29<sup>c</sup></b> | <b>17.60<sup>b</sup></b> | <b>22.03<sup>c</sup></b> | <b>19.62<sup>c</sup></b> | <b>19.06<sup>c</sup></b> |
|      |                  | CV(%)          | 3.95                     | 3.61                     | 4.79                     | 3.09                     | 2.93                     | 3.56                     |
|      | <i>F</i> -Value  | D              | 19.60**                  | 122.41**                 | 33.38**                  | 168.53**                 | 168.90**                 | 69.00**                  |
|      |                  | R              | 21.33**                  | 45.86*                   | 1.07 <sup>ns</sup>       | 14.36**                  | 36.10**                  | 26.93**                  |
|      |                  | D×R            | 2.08 <sup>ns</sup>       | 4.27**                   | 1.50 <sup>ns</sup>       | 3.38*                    | 1.74 <sup>ns</sup>       | 6.92**                   |

Note: Values represent the average ± the standard error. The means of treatments were compared based on the Tukey test at a probability level of 0.05. In the same year, different lowercase letters indicate a significant difference. <sup>ns</sup>-non-significant. \*\* and \* indicate a significant level of 0.01 (p < 0.01) and 0.05 (p < 0.05) respectively.
